# Supplementary material for: Comparative Transcriptome Analysis Reveals Hormone Signal Transduction and Sucrose Metabolism Related Genes Involved in the Regulation of Anther Dehiscence in Photo-Thermo-Sensitive Genic Male Sterile Wheat
Source: MDPI journal article supplement (doi:10.3390/biom12081149), 2022-08-20
Supplement: s1 [file s1]

**Table S2 qRT-PCR primer sequences**

| Genes                     | Primers (5' → 3')                                   |
|---------------------------|-----------------------------------------------------|
| <i>Actin</i>              | F: CAGGCAACCAACGCCTTTAC<br>R: AAATCTGTTACGGGAGCGT   |
| <i>TraesCS4B02G296900</i> | F: GCTGACGATCTTCTACGGGG<br>R: CTTGCGCTTCGACAGGAAC   |
| <i>TraesCS4D02G295900</i> | F: CAGTACATGAGGGAGCAGCC<br>R: GGGAAGTCGTCGAACACGAA  |
| <i>TraesCS1D02G196900</i> | F: GCTCACGGAGAACCCAG<br>R: CTTGAAGAAAGGCGGGGTCA     |
| <i>TraesCS7D02G160000</i> | F: GGGAGTAATGCTCACGGGAC<br>R: TGTGCTCCTCCTCCTTCTCC  |
| <i>TraesCS1B02G288100</i> | F: GGAGCTCAAGCTCGACAAGT<br>R: ACTTGCAATTCCTGGCGAGA  |
| <i>TraesCS7D02G419400</i> | F: GAGACGTCCTCACGCTGTC<br>R: ACAGGTAGAAAGTGGCGACG   |
| <i>TraesCS2B02G194200</i> | F: TGCTTCCCAAAGCACAACT<br>R: GACAAGCTCATTGGTGTGCG   |
| <i>TraesCS2D02G175600</i> | F: CAATTCTCCCTCGAGTCCCTG<br>R: GGATCGCGGCATTGTACTCA |
| <i>TraesCSU02G044500</i>  | F: TGATTCAGATACAGGCGGTC<br>R: GGCCCAAATGGTATCCTGAC  |
